# Supplementary material for: Rapamycin and WYE-354 suppress human gallbladder cancer xenografts in mice
Source: PubMed Central journal article supplement (PMC4741647; doi:10.18632/oncotarget.5047), 2015-09-11
Supplement: oncotarget-06-31877-s001.pdf [file oncotarget-06-31877-s001.pdf]

**SUPPLEMENTARY FIGURES**

**Rapamycin**

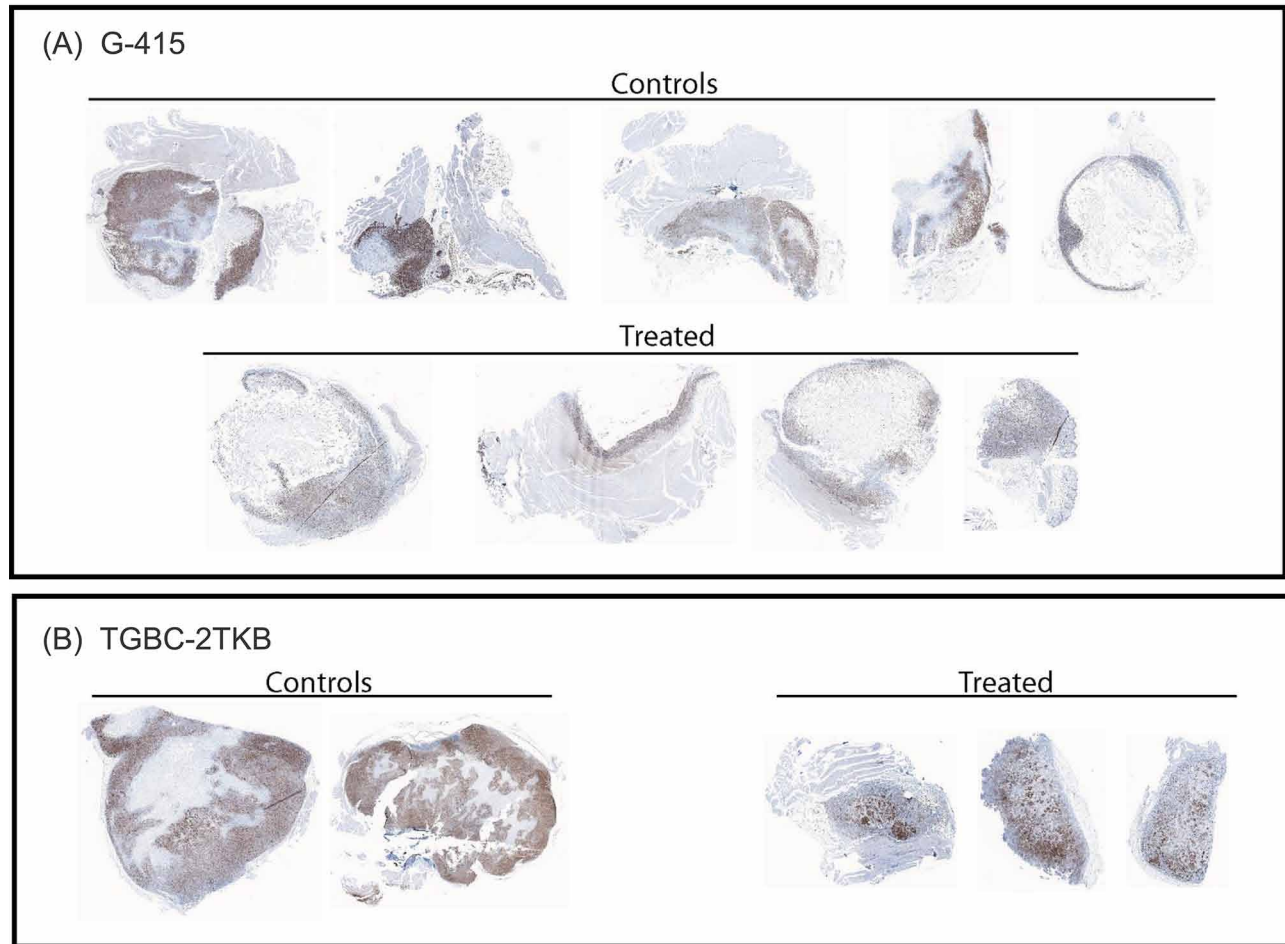

**Supplementary Figure S1: Immunohistochemical staining of phospho-4E-BP1 in GBC xenografts treated with rapamycin. A.** Staining of phospho-4E-BP1 in G-415 tumors. **B.** Staining of phospho-4E-BP1 in TGBC-2TKB tumors. Images represent original magnification 20 $\times$ .

**WYE-354**

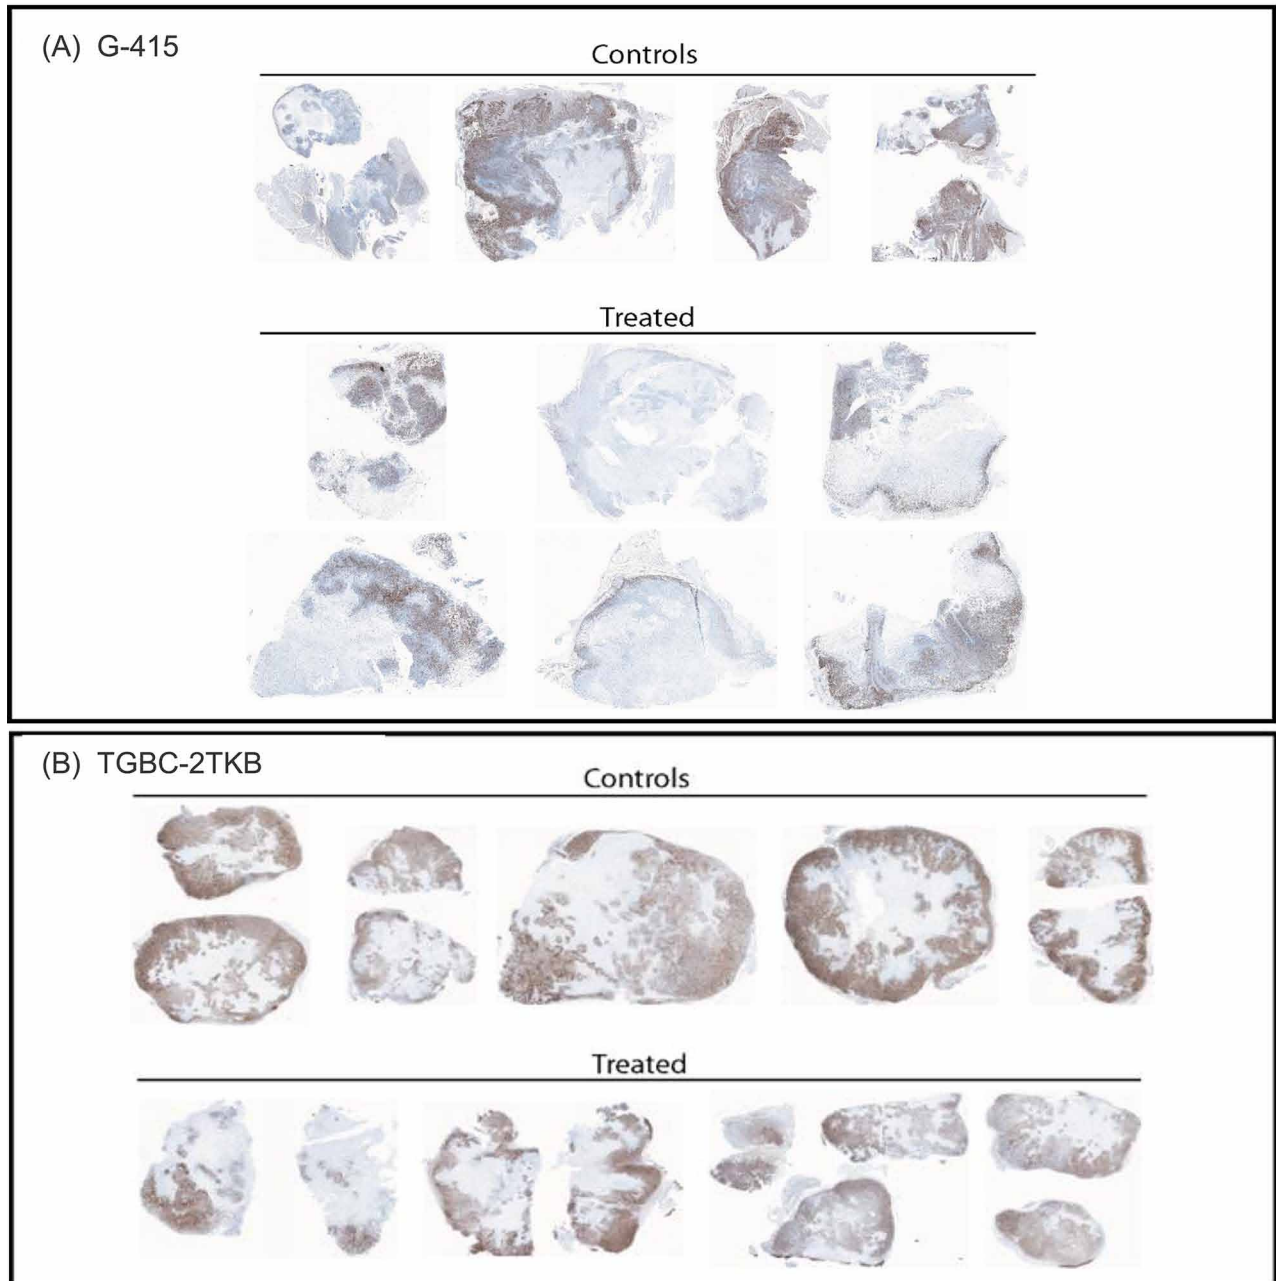

**Supplementary Figure S2: Immunohistochemical staining of phospho-4E-BP1 in GBC xenografts treated with WYE-354. A.** Staining of phospho-4E-BP1 in G-415 tumors. **B.** Staining of phospho-4E-BP1 in TGBC-2TKB tumors. Images represent original magnification 20 $\times$ .
